# Supplementary material
Source: Springer Nature journal article supplement (https://www.springermedizin.de/resource/supplementary/13006_2014_180_MOESM4_ESM.pdf/9628148)

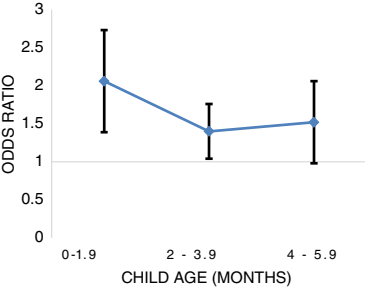

A. Diarrhea

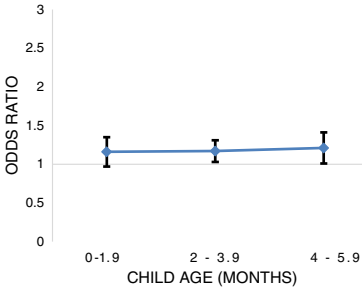

B. ARI

Supplement: MOESM4 [file 9628148]
